# Supplementary material
Source: PubMed Central journal article supplement (PMC2519406)
Supplement: supp_76_9_4000__1.pdf [file supp_76_9_4000__1.pdf]

Table S1. Disrupted *M. arthritidis* genes

| ORF              | Gene             | Product                                                               | Mp ortholog <sup>a</sup> | Mg ortholog <sup>b</sup> | Disrupted in Mp, Mg <sup>c</sup> | Essential in Bs <sup>c</sup> |
|------------------|------------------|-----------------------------------------------------------------------|--------------------------|--------------------------|----------------------------------|------------------------------|
| 006              |                  | TatD-related DNase                                                    | MYPUP_0140               | MG009                    | yes, yes                         |                              |
| 007              | <i>ksgA</i>      | Dimethyladenosine transferase                                         | MYPUP_0150               | MG463                    | yes, yes                         |                              |
| 012              | <i>rluC</i>      | RNA pseudouridylate synthase C protein                                | MYPUP_1170               | MG209                    | yes, no                          |                              |
| 019 <sup>d</sup> | <i>oppF/vals</i> | Oligopeptide ABC transporter/Valyl-tRNA synthetase                    | MYPUP_2860               | MG080                    | yes/no, no/no                    |                              |
| 023              | <i>argE</i>      | Acetylornithine deacetylase/Succinyl-diaminopimelate desuccinylase    | NA                       | NA                       | NA                               |                              |
| 032              |                  | Hypothetical protein                                                  | NA                       | NA                       | NA                               |                              |
| 036              | <i>mam</i>       | Superantigen MAM                                                      | NA                       | NA                       | NA                               |                              |
| 037              | <i>clpA</i>      | ATP-dependent protease                                                | NA                       | MG355                    | NA, yes                          |                              |
| 057              | <i>mspA</i>      | Massive surface protein                                               | NA                       | NA                       | NA                               |                              |
| 064              |                  | Lipoprotein                                                           | NA                       | NA                       | NA                               |                              |
| 065              |                  | Conserved lipoprotein                                                 | MYPUP_6060               | NA                       | yes, NA                          |                              |
| 068              |                  | Hypothetical protein                                                  | NA                       | NA                       | NA                               |                              |
| 069              |                  | Hypothetical protein                                                  | NA                       | NA                       | NA                               |                              |
| 070              |                  | Hypothetical protein                                                  | NA                       | NA                       | NA                               |                              |
| 072              |                  | Conserved lipoprotein                                                 | MYPUP_6070               | NA                       | yes, NA                          |                              |
| 074              |                  | Lipoprotein                                                           | NA                       | NA                       | NA                               |                              |
| 075              | <i>mnuA</i>      | Membrane nuclease A, lipoprotein                                      | MYPUP_6930               | NA                       | yes, NA                          |                              |
| 079              |                  | Conserved hypothetical protein, possible DNA alkylation repair enzyme | NA                       | NA                       | NA                               |                              |
| 080              |                  | Lipoprotein                                                           | NA                       | NA                       | NA                               |                              |
| 085              |                  | MAA2-related membrane protein                                         | NA                       | NA                       | NA                               |                              |
| 103              |                  | Phosphonate ABC transporter, permease protein (P69)                   | MYPUP_2180               | MG291                    | yes, yes                         |                              |
| 104              |                  | Phosphonate ABC transporter, substrate binding protein (P37)          | MYPUP_2250               | MG289                    | no, yes                          |                              |
| 106              |                  | Hypothetical protein                                                  | NA                       | NA                       | NA                               |                              |
| 109              | <i>ldh</i>       | Lactate dehydrogenase                                                 | MYPUP_7590               | MG460                    | no, yes                          |                              |
| 113              | <i>gidB</i>      | Glucose-inhibited division protein, GidB                              | MYPUP_1280               | MG380                    | yes, yes                         |                              |
| 121              |                  | Nitroreductase family protein                                         | NA                       | NA                       | NA                               |                              |
| 125              |                  | <i>M. hominis</i> P60-related lipoprotein                             | MYPUP_0070               | NA                       | no, NA                           |                              |
| 131              | <i>spoU</i>      | RNA methyltransferase TrmA family (see ORF 754)                       | MYPUP_1780               | MG252                    | no, yes                          |                              |
| 133              |                  | Hypothetical protein                                                  | NA                       | NA                       | NA                               |                              |
| 137              |                  | Conserved hypothetical protein                                        | NA                       | NA                       | NA                               |                              |
| 142              |                  | Membrane protein                                                      | NA                       | NA                       | NA                               |                              |
| 150              | <i>mspI</i>      | Massive surface protein                                               | NA                       | NA                       | NA                               |                              |
| 156              |                  | Hypothetical protein                                                  | NA                       | NA                       | NA                               |                              |

|     |             |                                                               |           |       |          |     |
|-----|-------------|---------------------------------------------------------------|-----------|-------|----------|-----|
| 163 |             | Putative SAM-dependent methyltransferase                      | MYPU_0540 | MG056 | no, yes  |     |
| 168 |             | Conserved hypothetical protein                                | NA        | MG432 | NA, no   |     |
| 169 | <i>yehF</i> | GTP-binding protein YchF (putative GTPase translation factor) | MYPU_1650 | MG024 | no, yes  |     |
| 172 |             | Hypothetical metal-dependent hydrolase                        | MYPU_3260 | NA    | yes, NA  |     |
| 179 | <i>recA</i> | DNA recombination protein A                                   | MYPU_2520 | MG339 | yes, yes |     |
| 186 | <i>dinB</i> | Pol_IV_kappa DNA polymerase (DNA polymerase IV)               | MYPU_1880 | MG360 | no, yes  |     |
| 188 |             | Hypothetical protein                                          | NA        | NA    | NA       |     |
| 191 |             | Hypothetical protein                                          | NA        | NA    | NA       |     |
| 197 |             | Hypothetical protein                                          | NA        | NA    | NA       |     |
| 198 |             | Hypothetical protein                                          | NA        | NA    | NA       |     |
| 214 |             | Lipoprotein                                                   | NA        | NA    | NA       |     |
| 218 |             | Lipoprotein                                                   | NA        | NA    | NA       |     |
| 220 |             | Lipoprotein                                                   | NA        | NA    | NA       |     |
| 221 |             | Lipoprotein                                                   | NA        | NA    | NA       |     |
| 224 |             | Lipoprotein                                                   | NA        | NA    | NA       |     |
| 226 |             | Conserved hypothetical lipoprotein                            | NA        | NA    | NA       |     |
| 227 |             | Lipoprotein                                                   | NA        | NA    | NA       |     |
| 229 |             | Lipoprotein                                                   | NA        | NA    | NA       |     |
| 230 |             | Hypothetical membrane protein                                 | NA        | NA    | NA       |     |
| 234 |             | Lipoprotein                                                   | NA        | NA    | NA       |     |
| 236 |             | DNA processing protein Smf                                    | MYPU_5470 | NA    | no, NA   |     |
| 241 |             | Rhodanese-like domain protein                                 | NA        | NA    | NA       |     |
| 242 |             | COF family HAD hydrolase protein                              | MYPU_3110 | NA    | no, NA   |     |
| 243 | <i>rnhC</i> | Ribonuclease HIII                                             | MYPU_3000 | MG199 | no, no   |     |
| 250 |             | Hypothetical membrane protein                                 | MYPU_5030 | NA    | yes, NA  |     |
| 252 |             | Conserved hypothetical protein                                | MYPU_5020 | NA    | no, NA   |     |
| 254 |             | Conserved hypothetical protein                                | MYPU_5010 | NA    | no, NA   |     |
| 258 | <i>atpA</i> | ATP synthase F1 alpha subunit                                 | MYPU_7000 | MG401 | yes, no  |     |
| 267 |             | Hypothetical protein                                          | NA        | NA    | NA       |     |
| 268 |             | Hypothetical protein                                          | NA        | NA    | NA       |     |
| 269 | <i>ppa</i>  | Inorganic pyrophosphatase                                     | MYPU_4700 | MG351 | no, no   |     |
| 275 | <i>mshL</i> | Massive surface protein                                       | NA        | NA    | NA       |     |
| 277 | <i>tktA</i> | Transketolase                                                 | MYPU_5110 | MG066 | no, yes  | yes |
| 278 |             | Conserved hypothetical protein                                | NA        | NA    | NA       |     |
| 286 | <i>rluB</i> | Ribosomal large subunit pseudouridine synthase B              | MYPU_3370 | NA    | no, NA   |     |
| 288 |             | Conserved hypothetical protein                                | MYPU_3560 | NA    | yes, NA  |     |

|     |             |                                                            |           |       |         |     |
|-----|-------------|------------------------------------------------------------|-----------|-------|---------|-----|
| 291 |             | Conserved hypothetical protein                             | MYPU_3570 | NA    | yes, NA |     |
| 307 | <i>recU</i> | Recombination protein U                                    | MYPU_0860 | MG352 | yes, no |     |
| 324 |             | Lipoprotein                                                | NA        | NA    | NA      |     |
| 332 | <i>ushA</i> | 5' nucleosidase                                            | MYPU_0550 | NA    | yes, NA |     |
| 339 |             | O-methyltransferase                                        | MYPU_3080 | NA    | yes, NA |     |
| 345 |             | Lipoprotein                                                | NA        | NA    | NA      |     |
| 352 |             | Hypothetical protein                                       | NA        | NA    | NA      |     |
| 353 |             | Cysteine protease, lipoprotein, homologous to ORF 582      | NA        | NA    | NA      |     |
| 358 | <i>mspB</i> | MspB                                                       | NA        | NA    | NA      |     |
| 366 |             | Putative esterase or lipase, membrane protein              | MYPU_3130 | NA    | no, NA  |     |
| 369 | <i>rpsO</i> | Ribosomal protein S15                                      | MYPU_3280 | MG424 | no, no  | yes |
| 372 |             | Conserved hypothetical membrane protein                    | MYPU_4610 | NA    | yes, NA |     |
| 377 | <i>hpt</i>  | Hypoxanthine phosphoribosyltransferase                     | MYPU_5510 | MG458 | no, no  | yes |
| 378 | <i>dgk</i>  | Deoxyguanosine kinase                                      | MYPU_5520 | MG268 | yes, no |     |
| 380 |             | Hypothetical membrane protein                              | NA        | NA    | NA      |     |
| 381 |             | Very hypothetical protein                                  | NA        | NA    | NA      |     |
| 387 |             | conserved hypothetical protein, possible methyltransferase | MYPU_5420 | NA    | no, NA  |     |
| 388 | <i>ruvA</i> | Holliday junction DNA helicase motor protein               | MYPU_6570 | MG358 | yes, no |     |
| 389 | <i>ruvB</i> | Holliday junction DNA helicase                             | MYPU_6580 | MG359 | yes, no |     |
| 404 |             | Hypothetical membrane protein                              | NA        | NA    | NA      |     |
| 422 | <i>rplO</i> | Ribosomal protein L15                                      | MYPU_5690 | MG169 | no, no  | yes |
| 448 | <i>xfp</i>  | Xylulose 5-p-fructose 6-p-phosphoketolase                  | NA        | NA    | NA      |     |
| 456 |             | Conserved hypothetical lipoprotein, putative protease      | NA        | NA    | NA      |     |
| 459 |             | Hypothetical membrane protein                              | NA        | NA    | NA      |     |
| 469 | <i>mspC</i> | Massive surface protein                                    | NA        | NA    | NA      |     |
| 471 | <i>mspJ</i> | Massive surface protein                                    | NA        | NA    | NA      |     |
| 472 |             | MspJ', extension of MspJ                                   | NA        | NA    | NA      |     |
| 481 | <i>mspD</i> | Massive surface protein                                    | NA        | NA    | NA      |     |
| 484 |             | Hypothetical protein                                       | NA        | NA    | NA      |     |
| 486 |             | Hypothetical lipoprotein                                   | NA        | NA    | NA      |     |
| 488 |             | Hypothetical lipoprotein                                   | NA        | NA    | NA      |     |
| 492 | <i>mspE</i> | Massive surface protein                                    | NA        | NA    | NA      |     |
| 497 | <i>mspF</i> | Massive surface protein                                    | NA        | NA    | NA      |     |
| 498 | <i>atpD</i> | ATP synthase subunit B                                     | MYPU_6990 | MG399 | no, no  |     |
| 499 | <i>atpA</i> | ATP synthase subunit A                                     | MYPU_7000 | MG401 | yes, no |     |
| 500 |             | Conserved hypothetical membrane protein                    | MYPU_5000 | NA    | yes, NA |     |

|     |             |                                                       |           |       |         |
|-----|-------------|-------------------------------------------------------|-----------|-------|---------|
| 501 |             | Conserved hypothetical protein                        | MYPU_5010 | NA    | no, NA  |
| 505 |             | Conserved hypothetical membrane protein               | MYPU_5030 | NA    | yes, NA |
| 506 |             | Conserved hypothetical lipoprotein                    | MYPU_5040 | NA    | yes, NA |
| 508 |             | Conserved hypothetical membrane protein               | MYPU_4380 | NA    | yes, NA |
| 513 |             | Hypothetical membrane protein                         | NA        | NA    | NA      |
| 518 |             | Conserved hypothetical protein                        | NA        | NA    | NA      |
| 519 |             | Hypothetical protein                                  | NA        | NA    | NA      |
| 520 |             | COF family HAD hydrolase protein, conserved           | MYPU_2440 | MG265 | no, no  |
| 523 | <i>rmuC</i> | RmuC domain protein                                   | MYPU_4640 | NA    | yes, NA |
| 524 |             | Haloacid dehalogenase-like hydrolase                  | NA        | NA    | NA      |
| 526 |             | MAA2-related membrane protein                         | NA        | NA    | NA      |
| 533 |             | Lipoprotein, putative acid phosphatase                | NA        | NA    | NA      |
| 535 |             | Hypothetical protein                                  | NA        | NA    | NA      |
| 536 |             | Hypothetical protein                                  | NA        | NA    | NA      |
| 538 |             | Membrane protein putative                             | NA        | NA    | NA      |
| 539 |             | ABC transporter ATP-binding protein                   | NA        | NA    | NA      |
| 545 |             | Hypothetical protein                                  | NA        | NA    | NA      |
| 548 |             | Hypothetical protein                                  | NA        | NA    | NA      |
| 549 |             | Hypothetical protein                                  | NA        | NA    | NA      |
| 551 |             | Hypothetical protein                                  | NA        | NA    | NA      |
| 555 |             | Conserved hypothetical protein                        | NA        | NA    | NA      |
| 556 |             | Conserved hypothetical protein                        | NA        | NA    | NA      |
| 557 |             | Hypothetical protein                                  | NA        | NA    | NA      |
| 558 |             | Hypothetical protein                                  | NA        | NA    | NA      |
| 560 |             | ABC transporter ATP-binding protein                   | NA        | NA    | NA      |
| 561 |             | Conserved hypothetical protein                        | NA        | NA    | NA      |
| 562 |             | Predicted helicase                                    | MYPU_1220 | MG140 | yes, no |
| 564 |             | Hypothetical protein                                  | NA        | NA    | NA      |
| 565 |             | Hypothetical protein                                  | NA        | NA    | NA      |
| 568 |             | Hypothetical protein                                  | NA        | NA    | NA      |
| 571 |             | Hypothetical protein                                  | NA        | NA    | NA      |
| 575 |             | ABC transporter ATP-binding protein, NosF             | MYPU_1960 | NA    | yes, NA |
| 576 |             | Lipoprotein                                           | NA        | NA    | NA      |
| 579 |             | Hypothetical protein                                  | NA        | NA    | NA      |
| 580 |             | Amidohydrolase family protein                         | NA        | NA    | NA      |
| 582 |             | Lipoprotein, cysteine protease, homologous to ORF 353 | NA        | NA    | NA      |

|     |             |                                                                 |           |         |         |     |
|-----|-------------|-----------------------------------------------------------------|-----------|---------|---------|-----|
| 591 |             | Hypothetical protein                                            | NA        | NA      | NA      |     |
| 598 |             | Conserved hypothetical protein                                  | NA        | NA      | NA      |     |
| 600 |             | Hypothetical protein                                            | NA        | NA      | NA      |     |
| 601 |             | Hypothetical protein                                            | NA        | NA      | NA      |     |
| 605 |             | Hypothetical protein                                            | NA        | NA      | NA      |     |
| 606 |             | Hypothetical protein                                            | NA        | NA      | NA      |     |
| 611 | <i>pepF</i> | Oligoendopeptidase PepF                                         | MYPU_3210 | MG183   | yes, no |     |
| 622 |             | Conserved hypothetical protein                                  | NA        | NA      | NA      |     |
| 623 |             | Hypothetical protein, putative ABC transporter permease protein | NA        | NA      | NA      |     |
| 626 |             | Proline iminopeptidase                                          | NA        | MG020   | NA, no  |     |
| 628 | <i>potD</i> | Spermidine/putrescine ABC transporter                           | MYPU_4220 | MG045   | no, no  |     |
| 634 | <i>potD</i> | Spermidine/putrescine ABC transporter                           | MYPU_4220 | MG045   | no, no  |     |
| 635 | <i>era</i>  | GTP-binding protein Era                                         | MYPU_3800 | MG387   | no, no  |     |
| 637 |             | Bacteriocin exporter and processing endoprotease                | MYPU_3760 | MG390   | yes, no |     |
| 647 | <i>mspG</i> | Massive surface protein                                         | NA        | NA      | NA      |     |
| 653 | <i>mspH</i> | Massive surface protein                                         | NA        | NA      | NA      |     |
| 656 | <i>fpg</i>  | Formamidopyrimidine-DNA glycosylase MutM                        | MYPU_3100 | MG262.1 | no, yes |     |
| 661 |             | Conserved hypothetical membrane protein                         | MYPU_2960 | NA      | no, NA  |     |
| 663 |             | Membrane protein, homologous to ORF665                          | NA        | NA      | NA      |     |
| 665 |             | Membrane protein, homologous to ORF663                          | NA        | NA      | NA      |     |
| 667 |             | Conserved hypothetical protein                                  | MYPU_2740 | NA      | no, NA  |     |
| 668 | <i>norM</i> | Putative Na <sup>+</sup> driven multidrug efflux pump           | MYPU_2930 | NA      | no, NA  |     |
| 673 |             | Conserved hypothetical protein                                  | MYPU_4570 | NA      | no, NA  |     |
| 678 |             | Hypothetical protein                                            | NA        | NA      | NA      |     |
| 679 |             | Hypothetical protein                                            | NA        | NA      | NA      |     |
| 681 | <i>hsdM</i> | DNA methyltransferase                                           | MYPU_4330 | NA      | yes, NA |     |
| 687 |             | Conserved hypothetical protein, expressed in <i>M. mobile</i>   | MYPU_2260 | MG103   | yes, no |     |
| 694 | <i>rpsR</i> | Ribosomal protein S18                                           | MYPU_6090 | MG092   | yes, no | yes |
| 698 | <i>hlyC</i> | Putative hemolysin                                              | MYPU_5140 | MG146   | no, no  |     |
| 699 | <i>def</i>  | Polypeptide deformylase                                         | MYPU_6890 | MG106   | no, no  |     |
| 708 | <i>oppB</i> | Oligopeptide ABC transporter, permease                          | MYPU_2830 | MG077   | no, no  |     |
| 709 |             | Conserved protein                                               | MYPU_1760 | NA      | no, NA  |     |
| 711 |             | Hypothetical protein                                            | NA        | NA      | NA      |     |
| 719 | <i>rpe</i>  | Ribulose-phosphate 3-epimerase                                  | MYPU_6830 | MG112   | no, yes |     |
| 720 |             | Conserved membrane protein                                      | MYPU_0480 | NA      | no, NA  |     |
| 722 |             | Lipoprotein                                                     | NA        | NA      | NA      |     |

|     |                   |                                                                                            |  |           |       |          |     |
|-----|-------------------|--------------------------------------------------------------------------------------------|--|-----------|-------|----------|-----|
| 723 |                   | Membrane nuclease                                                                          |  | MYPU_6940 | NA    | yes, NA  |     |
| 727 | <i>mspK</i>       | Massive surface protein                                                                    |  | NA        | NA    | NA       |     |
| 729 |                   | Hypothetical protein related to the MAM superantigen                                       |  | NA        | NA    | NA       |     |
| 734 |                   | Lipoprotein                                                                                |  | NA        | NA    | NA       |     |
| 738 | <i>adhA</i>       | Alcohol dehydrogenase                                                                      |  | NA        | NA    | NA       |     |
| 746 |                   | Fragmented putative adhesin MAA1                                                           |  | NA        | NA    | NA       |     |
| 754 | <i>trmA</i>       | RNA methyltransferase TrmA family (see ORF 131)                                            |  | NA        | NA    | NA       |     |
| 755 | <i>trmE</i>       | tRNA modification TrmE                                                                     |  | MYPU_0130 | MG008 | no, no   |     |
| 783 | <i>tex</i>        | Transcription accessory protein                                                            |  | NA        | NA    | NA       |     |
| 789 | <i>gidA</i>       | Glucose inhibited division protein A                                                       |  | MYPU_2530 | MG379 | no, no   |     |
| 790 |                   | Conserved hypothetical protein                                                             |  | MYPU_2540 | NA    | yes, NA  |     |
| 792 |                   | Lipoprotein                                                                                |  | NA        | NA    | NA       |     |
| 793 |                   | Lipoprotein, closely related to protective antigen MAA2                                    |  | NA        | NA    | NA       |     |
| 795 |                   | Conserved hypothetical protein                                                             |  | NA        | NA    | NA       |     |
| 796 |                   | Hypothetical protein                                                                       |  | NA        | NA    | NA       |     |
| 801 | <i>lemA</i>       | LemA protein                                                                               |  | MYPU_7580 | NA    | no, NA   |     |
| 803 |                   | Hypothetical protein                                                                       |  | NA        | NA    | NA       |     |
| 809 |                   | Hypothetical protein                                                                       |  | NA        | NA    | NA       |     |
| 811 |                   | Lipoprotein                                                                                |  | NA        | NA    | NA       |     |
| 815 | <i>ung</i>        | Uracil-DNA glycosylase                                                                     |  | MYPU_6150 | MG097 | yes, no  |     |
| 816 | <i>fnt</i>        | Methionyl-tRNA formyltransferase                                                           |  | MYPU_0450 | MG365 | no, no   | yes |
| 819 |                   | Macrophage activating lipoprotein-404 precursor, sugar ABC transporter binding lipoprotein |  | MYPU_3460 | NA    | yes, NA  |     |
| 821 |                   | Sugar ABC transporter ATP-binding protein                                                  |  | MYPU_6190 | MG119 | yes, no  |     |
| 822 |                   | Sugar ABC transporter permease protein                                                     |  | MYPU_6180 | MG120 | yes, no  |     |
| 823 |                   | Sugar ABC transporter permease protein                                                     |  | MYPU_6170 | MG121 | no, yes  |     |
| 825 |                   | Membrane protein                                                                           |  | NA        | NA    | NA       |     |
| 826 |                   | Hypothetical protein                                                                       |  | NA        | NA    | NA       |     |
| 827 |                   | Hypothetical protein                                                                       |  | NA        | NA    | NA       |     |
| 828 |                   | Conserved hypothetical protein                                                             |  | MYPU_0580 | NA    | yes, NA  |     |
| 830 |                   | DHH family phosphoesterase                                                                 |  | MYPU_6920 | MG190 | no, no   |     |
| 831 |                   | DHH family phosphoesterase                                                                 |  | MYPU_0220 | MG190 | yes, no  |     |
| 844 |                   | Lipoprotein                                                                                |  | MYPU_3200 | NA    | yes, NA  |     |
| 847 | <i>pcrA, uvrD</i> | ATP-dependent DNA helicase                                                                 |  | MYPU_6980 | MG244 | yes, yes | yes |
| 852 | <i>recD</i>       | Exodeoxyribonuclease V, alpha subunit                                                      |  | MYPU_7820 | NA    | no, NA   |     |
| 861 | <i>pstS</i>       | Phosphate binding protein, lipoprotein                                                     |  | NA        | MG412 | NA, yes  |     |
| 863 | <i>pstA</i>       | Phosphate ABC transporter permease protein                                                 |  | NA        | MG411 | NA, yes  |     |

|     |             |                                               |           |       |         |
|-----|-------------|-----------------------------------------------|-----------|-------|---------|
| 864 | <i>pstB</i> | Phosphate ABC transporter ATP-binding protein | NA        | MG410 | NA, yes |
| 865 | <i>phoU</i> | Phosphate transport system regulatory protein | NA        | MG409 | NA, no  |
| 867 |             | FMN oxidoreductase                            | MYPY_7720 | NA    | yes, NA |
| 868 |             | Hypothetical membrane protein                 | NA        | NA    | NA      |
| 871 |             | Membrane nuclease, lipoprotein                | MYPY_1390 | NA    | yes, NA |
| 874 |             | Membrane nuclease, lipoprotein                | NA        | NA    | NA      |
| 876 |             | Hypothetical protein                          | NA        | NA    | NA      |

<sup>a</sup>MYPY\_#

<sup>b</sup>MG#

<sup>c</sup>Essential genes in *M. pulmonis* (Mp), *M. genitalium* (Mg) and *B. subtilis* (Bs) as reported by French et al., Glass et al., and Kobayashi et al. (1-3).

<sup>d</sup>Marth\_orf019 appears to be a fusion of *oppF* (first half of fused gene) and the valyl tRNA synthetase gene *valS*. All transposon disruptions were in the *oppF* portion of the gene.

## References

1. **French, C. T., P. Lao, A. E. Loraine, B. T. Matthews, H. Yu, and K. Dybvig.** 2008. Large-scale transposon mutagenesis of *Mycoplasma pulmonis*. *Mol. Microbiol.* doi:10.1111/j.1365-2958.2008.06262.x.
2. **Glass, J. I., N. Assas-Garcia, N. Alperovich, S. Yooseph, M. R. Lewis, M. Maruf, et al.** 2006. Essential genes of a minimal bacterium. *Proc. Nat. Acad. Sci. USA* **103**:425-430.
3. **Kobayashi, K., S. D. Ehrlich, A. Albertini, G. Amati, K. K. Andersen, M. Arnaud, et al.** 2003. Essential *Bacillus subtilis* genes. *Proc. Nat. Acad. Sci. USA* **100**:4678-4683.
